# Supplementary material for: Life in a New Normal with a Self-Care Routine: A Cross-Sectional Study of Older Adults’ Daily Health Behaviors (DHB) Performance during the Initial Outbreak of COVID-19 in China
Source: MDPI journal article supplement (doi:10.3390/nu14081678), 2022-04-18
Supplement: s1 [file s1]

**Supplementary Table S1.** Statistical measures of the three models under multivariable analysis ( $p < 0.001$  for all models)

| Measures                | Model 1 | Model 2 | Model 3 |
|-------------------------|---------|---------|---------|
| F                       | 3.808   | 3.453   | 3.111   |
| R <sup>2</sup>          | 0.047   | 0.058   | 0.059   |
| ΔR <sup>2</sup>         | 0.047   | 0.011   | 0.001   |
| Adjusted R <sup>2</sup> | 0.035   | 0.041   | 0.040   |
